# Supplementary material for: Integrating Ecosystem Service Values and Economic Benefits for Sustainable Land Use Management in Semi-Arid Regions in Northern China
Source: MDPI journal article supplement (doi:10.3390/su131810431), 2021-09-18
Supplement: s1 [file s1]

Archive with 1 entries (1 files):
- sustainability-1353392-Supplementary.pdf
